# Supplementary material for: Genome-wide identification and expression pattern of drought-responsive members of the NAC family in maize
Source: PubMed Central journal article supplement — Meta Gene. 2014 Jun 1;2:407–17. doi: 10.1016/j.mgene.2014.05.001 (PMC4287890; doi:10.1016/j.mgene.2014.05.001), 2014-06-01
Supplement: mmc1.pdf [file mmc1.pdf]

**Figure S1.**

**(A)**

| NAC Proteins                   |     | Motifs |     |     |     |     | NAC Proteins          |     | Motifs |     |     |     |     |      |
|--------------------------------|-----|--------|-----|-----|-----|-----|-----------------------|-----|--------|-----|-----|-----|-----|------|
| Glyma02g26480.1                | [2] | [4]    | [1] | [5] | [3] | [5] | ZmNAC51               | [2] | [4]    | [1] | [5] | [3] | [6] |      |
| Glyma14g24220.1                | [2] | [4]    | [1] | [5] | [3] | [6] | ZmNAC52               | [2] | [4]    | [1] | [5] | [3] | [6] |      |
| Oa01g66120 O <sub>1</sub> NAC6 | [2] | [4]    | [1] | [5] | [3] | [6] | ZmNAC53               | [2] | [4]    | [1] | [5] | [3] | [6] |      |
| Oa05g34830                     | [2] | [4]    | [1] | [5] | [3] | [6] | ZmNAC58               | [2] | [4]    | [1] | [5] | [3] | [6] | [26] |
| Oa11g03300                     | [2] | [4]    | [1] | [5] | [3] | [6] | ZmNAC59               | [2] | [4]    | [1] | [5] | [3] | [6] | [27] |
| ZmNAC1                         | [2] | [4]    | [1] | [5] | [3] | [6] | ZmNAC60               | [2] | [4]    | [1] | [5] | [3] | [6] | [27] |
| ZmNAC100                       | [2] | [4]    | [1] | [5] | [3] | [6] | ZmNAC62               | [2] | [4]    | [1] | [5] | [3] | [6] | [10] |
| ZmNAC103                       | [2] | [4]    | [1] | [5] | [3] | [6] | ZmNAC63               | [2] | [4]    | [1] | [5] | [3] | [6] |      |
| ZmNAC107                       | [2] | [4]    | [1] | [5] | [3] | [6] | ZmNAC64               | [2] | [4]    | [1] | [5] | [3] | [6] |      |
| ZmNAC111                       | [2] | [4]    | [1] | [5] | [3] | [6] | ZmNAC65               | [2] | [4]    | [1] | [5] | [3] | [6] | [20] |
| ZmNAC112                       | [2] | [4]    | [1] | [5] | [3] | [6] | ZmNAC67               | [2] | [4]    | [1] | [5] | [3] | [6] |      |
| ZmNAC114                       | [2] | [4]    | [1] | [5] | [3] | [6] | ZmNAC68               | [2] | [4]    | [1] | [5] | [3] | [6] | [26] |
| ZmNAC115                       | [2] | [4]    | [1] | [5] | [3] | [6] | ZmNAC70               | [2] | [4]    | [1] | [5] | [3] | [6] |      |
| ZmNAC117                       | [2] | [4]    | [1] | [5] | [3] | [6] | ZmNAC71               | [2] | [4]    | [1] | [5] | [3] | [6] |      |
| ZmNAC118                       | [2] | [4]    | [1] | [5] | [3] | [6] | ZmNAC72               | [2] | [4]    | [1] | [5] | [3] | [6] | [24] |
| ZmNAC119                       | [2] | [4]    | [1] | [5] | [3] | [6] | ZmNAC73               | [2] | [4]    | [1] | [5] | [3] | [6] |      |
| ZmNAC120                       | [2] | [4]    | [1] | [5] | [3] | [6] | ZmNAC79               | [2] | [4]    | [1] | [5] | [3] | [6] |      |
| ZmNAC122                       | [2] | [4]    | [1] | [5] | [3] | [6] | ZmNAC80               | [2] | [4]    | [1] | [5] | [3] | [6] | [20] |
| ZmNAC126                       | [2] | [4]    | [1] | [5] | [3] | [6] | ZmNAC83               | [2] | [4]    | [1] | [5] | [3] | [6] |      |
| ZmNAC127                       | [2] | [4]    | [1] | [5] | [3] | [6] | ZmNAC84               | [2] | [4]    | [1] | [5] | [3] | [6] | [1]  |
| ZmNAC133                       | [2] | [4]    | [1] | [5] | [3] | [6] | ZmNAC85               | [2] | [4]    | [1] | [5] | [3] | [6] | [6]  |
| ZmNAC134                       | [2] | [4]    | [1] | [5] | [3] | [6] | ZmNAC86               | [2] | [4]    | [1] | [5] | [3] | [6] | [27] |
| ZmNAC135                       | [2] | [4]    | [1] | [5] | [3] | [6] | ZmNAC87               | [2] | [4]    | [1] | [5] | [3] | [6] |      |
| ZmNAC136                       | [2] | [4]    | [1] | [5] | [3] | [6] | ZmNAC89               | [2] | [4]    | [1] | [5] | [3] | [6] | [26] |
| ZmNAC138                       | [2] | [4]    | [1] | [5] | [3] | [6] | ZmNAC90               | [2] | [4]    | [1] | [5] | [3] | [6] |      |
| ZmNAC139                       | [2] | [4]    | [1] | [5] | [3] | [6] | ZmNAC91               | [2] | [4]    | [1] | [5] | [3] | [6] |      |
| ZmNAC143                       | [2] | [4]    | [1] | [5] | [3] | [6] | ZmNAC92               | [2] | [4]    | [1] | [5] | [3] | [6] | [15] |
| ZmNAC144                       | [2] | [4]    | [1] | [5] | [3] | [6] | ZmNAC94               | [2] | [4]    | [1] | [5] | [3] | [6] | [26] |
| ZmNAC145                       | [2] | [4]    | [1] | [5] | [3] | [6] | ZmNAC96               | [2] | [4]    | [1] | [5] | [3] | [6] | [25] |
| ZmNAC146                       | [2] | [4]    | [1] | [5] | [3] | [6] | ZmNAC99               | [2] | [4]    | [1] | [5] | [3] | [6] |      |
| ZmNAC147                       | [2] | [4]    | [1] | [5] | [3] | [6] | ZmNAC24               | [2] | [4]    | [1] | [5] | [3] | [6] | [31] |
| ZmNAC148                       | [2] | [4]    | [1] | [5] | [3] | [6] | AT1G62890.L (ANAC019) | [2] | [4]    | [1] | [5] | [3] | [6] |      |
| ZmNAC149                       | [2] | [4]    | [1] | [5] | [3] | [6] | AT3G45500.L (ANAC055) | [2] | [4]    | [1] | [5] | [3] | [6] | [24] |
| ZmNAC15                        | [2] | [4]    | [1] | [5] | [3] | [6] | Glyma06g38410.1       | [2] | [4]    | [1] | [5] | [3] | [6] |      |
| ZmNAC150                       | [2] | [4]    | [1] | [5] | [3] | [6] | Glyma12g22890.1       | [2] | [4]    | [1] | [5] | [3] | [6] | [15] |
| ZmNAC151                       | [2] | [4]    | [1] | [5] | [3] | [6] | Glyma12g35900.1       | [2] | [4]    | [1] | [5] | [3] | [6] | [11] |
| ZmNAC152                       | [2] | [4]    | [1] | [5] | [3] | [6] | Oa03g60080 SNAC1      | [2] | [4]    | [1] | [5] | [3] | [6] | [24] |
| ZmNAC16                        | [2] | [4]    | [1] | [5] | [3] | [6] | ZmNAC10               | [2] | [4]    | [1] | [5] | [3] | [6] | [10] |
| ZmNAC17                        | [2] | [4]    | [1] | [5] | [3] | [6] | ZmNAC104              | [2] | [4]    | [1] | [5] | [3] | [6] | [24] |
| ZmNAC19                        | [2] | [4]    | [1] | [5] | [3] | [6] | ZmNAC105              | [2] | [4]    | [1] | [5] | [3] | [6] | [24] |
| ZmNAC2                         | [2] | [4]    | [1] | [5] | [3] | [6] | ZmNAC106              | [2] | [4]    | [1] | [5] | [3] | [6] |      |
| ZmNAC20                        | [2] | [4]    | [1] | [5] | [3] | [6] | ZmNAC11               | [2] | [4]    | [1] | [5] | [3] | [6] | [10] |
| ZmNAC21                        | [2] | [4]    | [1] | [5] | [3] | [6] | ZmNAC132              | [2] | [4]    | [1] | [5] | [3] | [6] |      |
| ZmNAC22                        | [2] | [4]    | [1] | [5] | [3] | [6] | ZmNAC140              | [2] | [4]    | [1] | [5] | [3] | [6] |      |
| ZmNAC23                        | [2] | [4]    | [1] | [5] | [3] | [6] | ZmNAC141              | [2] | [4]    | [1] | [5] | [3] | [6] |      |
| ZmNAC25                        | [2] | [4]    | [1] | [5] | [3] | [6] | ZmNAC18(ZmSNAC1)      | [2] | [4]    | [1] | [5] | [3] | [6] | [24] |
| ZmNAC26                        | [2] | [4]    | [1] | [5] | [3] | [6] | ZmNAC33               | [2] | [4]    | [1] | [5] | [3] | [6] | [20] |
| ZmNAC27                        | [2] | [4]    | [1] | [5] | [3] | [6] | ZmNAC36               | [2] | [4]    | [1] | [5] | [3] | [6] | [24] |
| ZmNAC28                        | [2] | [4]    | [1] | [5] | [3] | [6] | ZmNAC37               | [2] | [4]    | [1] | [5] | [3] | [6] |      |
| ZmNAC3                         | [2] | [4]    | [1] | [5] | [3] | [6] | ZmNAC38               | [2] | [4]    | [1] | [5] | [3] | [6] |      |
| ZmNAC31                        | [2] | [4]    | [1] | [5] | [3] | [6] | ZmNAC3                | [2] | [4]    | [1] | [5] | [3] | [6] |      |
| ZmNAC32                        | [2] | [4]    | [1] | [5] | [3] | [6] | ZmNAC74               | [2] | [4]    | [1] | [5] | [3] | [6] |      |
| ZmNAC35                        | [2] | [4]    | [1] | [5] | [3] | [6] | ZmNAC75               | [2] | [4]    | [1] | [5] | [3] | [6] | [24] |
| ZmNAC4                         | [2] | [4]    | [1] | [5] | [3] | [6] | ZmNAC76               | [2] | [4]    | [1] | [5] | [3] | [6] | [22] |
| ZmNAC45                        | [2] | [4]    | [1] | [5] | [3] | [6] | ZmNAC77               | [2] | [4]    | [1] | [5] | [3] | [6] |      |
| ZmNAC46                        | [2] | [4]    | [1] | [5] | [3] | [6] | ZmNAC78               | [2] | [4]    | [1] | [5] | [3] | [6] | [24] |
| ZmNAC47                        | [2] | [4]    | [1] | [5] | [3] | [6] | ZmNAC79               | [2] | [4]    | [1] | [5] | [3] | [6] | [27] |
|                                |     |        |     |     |     |     | ZmNAC88               | [2] | [4]    | [1] | [5] | [3] | [6] | [15] |
|                                |     |        |     |     |     |     | ZmNAC9                | [2] | [4]    | [1] | [5] | [3] | [6] | [10] |
|                                |     |        |     |     |     |     | ZmNAC95               | [2] | [4]    | [1] | [5] | [3] | [6] |      |
|                                |     |        |     |     |     |     | ZmNAC97               | [2] | [4]    | [1] | [5] | [3] | [6] |      |
|                                |     |        |     |     |     |     | ZmNAC98               | [2] | [4]    | [1] | [5] | [3] | [6] |      |
|                                |     |        |     |     |     |     | ZmNAC99               | [2] | [4]    | [1] | [5] | [3] | [6] |      |
|                                |     |        |     |     |     |     | ZmNAC100              | [2] | [4]    | [1] | [5] | [3] | [6] |      |
|                                |     |        |     |     |     |     | ZmNAC101              | [2] | [4]    | [1] | [5] | [3] | [6] |      |
|                                |     |        |     |     |     |     | ZmNAC102              | [2] | [4]    | [1] | [5] | [3] | [6] |      |
|                                |     |        |     |     |     |     | ZmNAC103              | [2] | [4]    | [1] | [5] | [3] | [6] |      |
|                                |     |        |     |     |     |     | ZmNAC104              | [2] | [4]    | [1] | [5] | [3] | [6] |      |
|                                |     |        |     |     |     |     | ZmNAC105              | [2] | [4]    | [1] | [5] | [3] | [6] |      |
|                                |     |        |     |     |     |     | ZmNAC106              | [2] | [4]    | [1] | [5] | [3] | [6] |      |
|                                |     |        |     |     |     |     | ZmNAC107              | [2] | [4]    | [1] | [5] | [3] | [6] |      |
|                                |     |        |     |     |     |     | ZmNAC108              | [2] | [4]    | [1] | [5] | [3] | [6] |      |
|                                |     |        |     |     |     |     | ZmNAC109              | [2] | [4]    | [1] | [5] | [3] | [6] |      |
|                                |     |        |     |     |     |     | ZmNAC110              | [2] | [4]    | [1] | [5] | [3] | [6] |      |
|                                |     |        |     |     |     |     | ZmNAC111              | [2] | [4]    | [1] | [5] | [3] | [6] |      |
|                                |     |        |     |     |     |     | ZmNAC112              | [2] | [4]    | [1] | [5] | [3] | [6] |      |
|                                |     |        |     |     |     |     | ZmNAC113              | [2] | [4]    | [1] | [5] | [3] | [6] |      |
|                                |     |        |     |     |     |     | ZmNAC114              | [2] | [4]    | [1] | [5] | [3] | [6] |      |
|                                |     |        |     |     |     |     | ZmNAC115              | [2] | [4]    | [1] | [5] | [3] | [6] |      |
|                                |     |        |     |     |     |     | ZmNAC116              | [2] | [4]    | [1] | [5] | [3] | [6] |      |
|                                |     |        |     |     |     |     | ZmNAC117              | [2] | [4]    | [1] | [5] | [3] | [6] |      |
|                                |     |        |     |     |     |     | ZmNAC118              | [2] | [4]    | [1] | [5] | [3] | [6] |      |
|                                |     |        |     |     |     |     | ZmNAC119              | [2] | [4]    | [1] | [5] | [3] | [6] |      |
|                                |     |        |     |     |     |     | ZmNAC120              | [2] | [4]    | [1] | [5] | [3] | [6] |      |
|                                |     |        |     |     |     |     | ZmNAC121              | [2] | [4]    | [1] | [5] | [3] | [6] |      |
|                                |     |        |     |     |     |     | ZmNAC122              | [2] | [4]    | [1] | [5] | [3] | [6] |      |
|                                |     |        |     |     |     |     | ZmNAC123              | [2] | [4]    | [1] | [5] | [3] | [6] |      |
|                                |     |        |     |     |     |     | ZmNAC124              | [2] | [4]    | [1] | [5] | [3] | [6] |      |
|                                |     |        |     |     |     |     | ZmNAC125              | [2] | [4]    | [1] | [5] | [3] | [6] |      |
|                                |     |        |     |     |     |     | ZmNAC126              | [2] | [4]    | [1] | [5] | [3] | [6] |      |
|                                |     |        |     |     |     |     | ZmNAC127              | [2] | [4]    | [1] | [5] | [3] | [6] |      |
|                                |     |        |     |     |     |     | ZmNAC128              | [2] | [4]    | [1] | [5] | [3] | [6] |      |
|                                |     |        |     |     |     |     | ZmNAC129              | [2] | [4]    | [1] | [5] | [3] | [6] |      |
|                                |     |        |     |     |     |     | ZmNAC130              | [2] | [4]    | [1] | [5] | [3] | [6] |      |
|                                |     |        |     |     |     |     | ZmNAC131              | [2] | [4]    | [1] | [5] | [3] | [6] |      |
|                                |     |        |     |     |     |     | ZmNAC132              | [2] | [4]    | [1] | [5] | [3] | [6] |      |
|                                |     |        |     |     |     |     | ZmNAC133              | [2] | [4]    | [1] | [5] | [3] | [6] |      |
|                                |     |        |     |     |     |     | ZmNAC134              | [2] | [4]    | [1] | [5] | [3] | [6] |      |
|                                |     |        |     |     |     |     | ZmNAC135              | [2] | [4]    | [1] | [5] | [3] | [6] |      |
|                                |     |        |     |     |     |     | ZmNAC136              | [2] | [4]    | [1] | [5] | [3] | [6] |      |
|                                |     |        |     |     |     |     | ZmNAC137              | [2] | [4]    | [1] | [5] | [3] | [6] |      |
|                                |     |        |     |     |     |     | ZmNAC138              | [2] | [4]    | [1] | [5] | [3] | [6] |      |
|                                |     |        |     |     |     |     | ZmNAC139              | [2] | [4]    | [1] | [5] | [3] | [6] |      |
|                                |     |        |     |     |     |     | ZmNAC140              | [2] | [4]    | [1] | [5] | [3] | [6] |      |
|                                |     |        |     |     |     |     | ZmNAC141              | [2] | [4]    | [1] | [5] | [3] | [6] |      |
|                                |     |        |     |     |     |     | ZmNAC142              | [2] | [4]    | [1] | [5] | [3] | [6] |      |
|                                |     |        |     |     |     |     | ZmNAC143              | [2] | [4]    | [1] | [5] | [3] | [6] |      |
|                                |     |        |     |     |     |     | ZmNAC144              | [2] | [4]    | [1] | [5] | [3] | [6] |      |
|                                |     |        |     |     |     |     | ZmNAC145              | [2] | [4]    | [1] | [5] | [3] | [6] |      |
|                                |     |        |     |     |     |     |                       |     |        |     |     |     |     |      |

Figure S1.

(B)

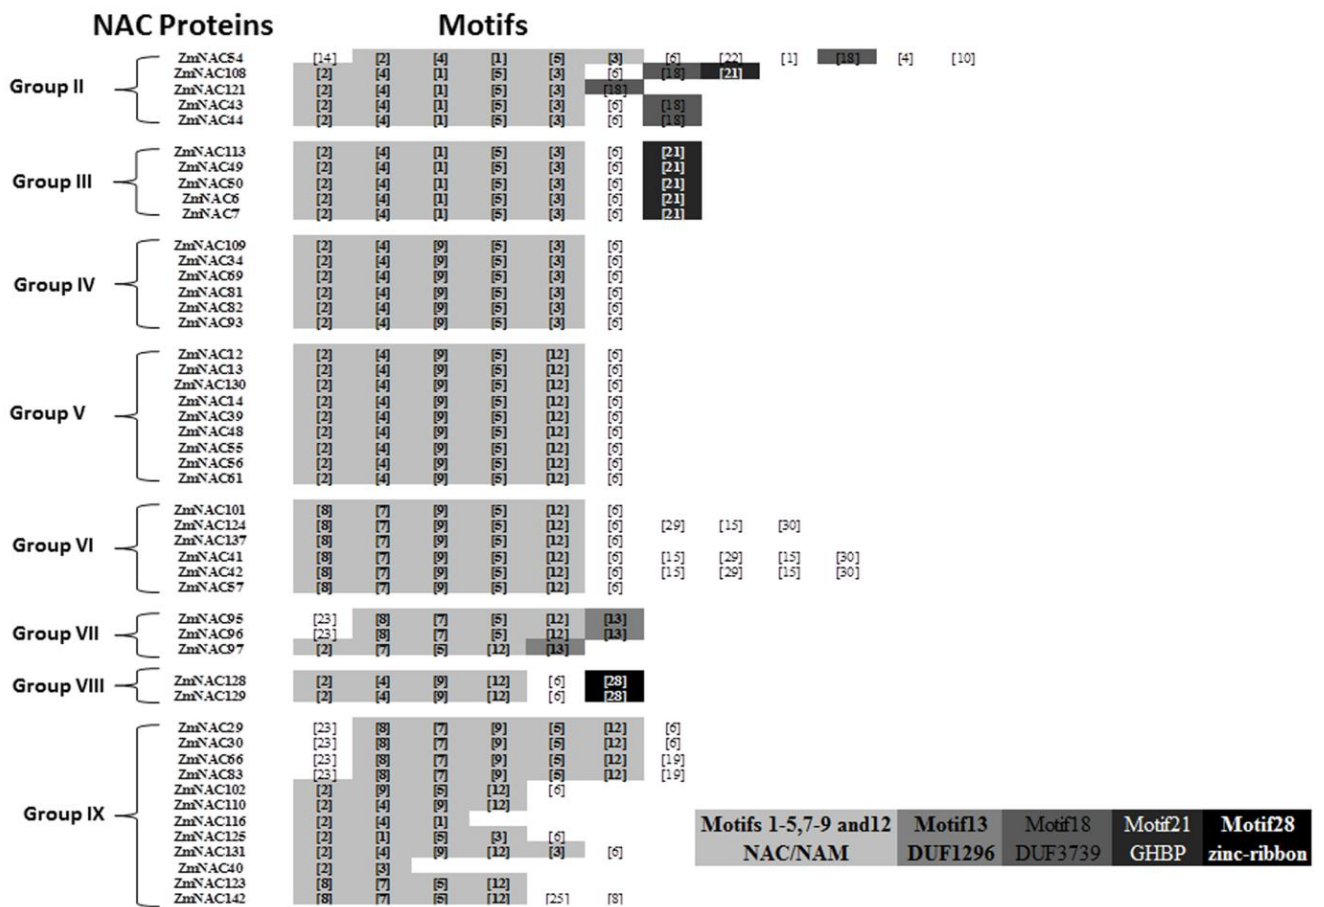

**Fig. S1. Distribution of conserved motifs in the NAC family members of maize.** All motifs were identified by MEME using the complete amino acid sequences of 152 maize and 11 well-known drought stress NAC proteins of Arabidopsis, rice, and soybean. (A) Group I. (B) Groups II–IX.

**Table S1.**

| Gene name | Primer  | Primer Sequence        | Primer length | Primer T <sub>M</sub> | Primer GC % |
|-----------|---------|------------------------|---------------|-----------------------|-------------|
| ZMNAC18F  | Forward | GAAGAACGAGTGGGAGAAGATG | 22            | 62.147                | 50          |
| ZMNAC18R  | Reverse | ACGAGTGCAGTGTGATTG     | 19            | 62.212                | 52.632      |
| ZMNAC145F | Forward | GGCGTCTTCTCCATCAGTATG  | 22            | 62.503                | 50          |
| ZMNAC145R | Reverse | CCGATGTGGCTGTTGAGTAG   | 20            | 62.186                | 55          |
| ZMNAC51F  | Forward | GAAGGCGCTCGTCTTCTAC    | 19            | 61.829                | 57.895      |
| ZMNAC51R  | Reverse | CTTACCCTGAGGCTGTTCTTC  | 21            | 61.954                | 52.381      |
| ZMNAC72F  | Forward | CACGCAAGAAGACCAACAAC   | 20            | 61.735                | 50          |
| ZMNAC72R  | Reverse | GTGTCGTACCGCTCGATAAC   | 20            | 62.029                | 55          |
| ZMNAC75F  | Forward | GAAGAACGAGTGGGAGAAGATG | 22            | 62.147                | 50          |
| ZMNAC75R  | Reverse | GTGGGTGATCTGCGAGTG     | 18            | 61.95                 | 61.111      |
| ZMNAC99F  | Forward | CAAGAAGGCTCTCGTCTTCTAC | 22            | 61.839                | 50          |
| ZMNAC99R  | Reverse | CCTGAGGCTGTTGTTCTTCT   | 20            | 61.806                | 50          |
| ZMNAC73F  | Forward | CGAGGTGGATCTCTACAAGTTC | 22            | 61.651                | 50          |
| ZMNAC73R  | Reverse | GGCGAGAAGAAGTACCACTC   | 20            | 61.58                 | 55          |
| ZMNAC52F  | Forward | CTGGTGATGCACTACCTCTG   | 20            | 61.688                | 55          |
| ZMNAC52R  | Reverse | CCATGGGTCGAACTTGTAGAG  | 21            | 61.929                | 52.381      |
| ZMNAC54F  | Forward | AAGGGTGGGAATTTGGTCTC   | 20            | 61.989                | 50          |
| ZMNAC54R  | Reverse | GCTCCAGAGAATCAGAGAAGTG | 22            | 61.947                | 50          |
| ZMNAC132F | Forward | CAAGAAGGCTCTCGTCTTCTAC | 22            | 61.839                | 50          |
| ZMNAC132R | Reverse | ACACCCACTCATCCACTTC    | 20            | 61.848                | 50          |
| ZMNAC37F  | Forward | GAGTGGATCATGCACGAGTA   | 20            | 61.293                | 50          |
| ZMNAC37R  | Reverse | GAGGAGATGAAACCAAGGAAGA | 22            | 61.677                | 45.455      |
| 18s RNAF  | Forward | TCAGCATGCCGCGTGAATATG  | 22            | 64.2                  | 54.5        |
| 18s RNAR  | Reverse | TGCTTCGGGCGAAACCAATTCC | 22            | 64.6                  | 54.5        |

**Table S1.** Primers used for candidate ZmNAC genes for qRT-PCR verification.

**Table S2.**

| ZmNAC name | GM ID                     | Chromosome No | Protein Length | Domain Start | Domain end | Domain length |
|------------|---------------------------|---------------|----------------|--------------|------------|---------------|
| ZMNAC1     | GRMZM2G406204_T01         | Chr:1         | 609            | 6            | 133        | 127           |
| ZMNAC2     | GRMZM2G025642_T01         | Chr:1         | 362            | 8            | 137        | 129           |
| ZMNAC3     | GRMZM2G059428_T01         | Chr:1         | 325            | 16           | 143        | 127           |
| ZMNAC4     | GRMZM2G059428_T03         | Chr:1         | 172            | 16           | 143        | 127           |
| ZMNAC5     | GRMZM2G031001_T01         | Chr:1         | 433            | 105          | 232        | 127           |
| ZMNAC6     | GRMZM2G011598_T01         | Chr:1         | 373            | 9            | 137        | 128           |
| ZMNAC7     | GRMZM2G082709_T01         | Chr:1         | 317            | 6            | 133        | 127           |
| ZMNAC8     | GRMZM2G475014_T01         | Chr:1         | 371            | 91           | 224        | 133           |
| ZMNAC9     | GRMZM2G430522_T01         | Chr:1         | 422            | 116          | 243        | 127           |
| ZMNAC10    | GRMZM2G430522_T02         | Chr:1         | 387            | 81           | 208        | 127           |
| ZMNAC11    | GRMZM2G430522_T03         | Chr:1         | 418            | 89           | 216        | 127           |
| ZMNAC12    | GRMZM2G054252_T03         | Chr:1         | 230            | 23           | 168        | 145           |
| ZMNAC13    | GRMZM2G054252_T02         | Chr:1         | 231            | 23           | 169        | 146           |
| ZMNAC14    | NM_001153991              | Chr:1         | 231            | 23           | 169        | 146           |
| ZMNAC15    | PUT-1-171a-Zea_mays-13423 | Chr:1         | 237            | 30           | 158        | 128           |
| ZMNAC16    | GRMZM2G152543_T01         | Chr:1         | 392            | 16           | 143        | 127           |
| ZMNAC17    | GRMZM2G163251_T01         | Chr:1         | 368            | 41           | 173        | 132           |
| ZMNAC18    | GRMZM2G347043_T01         | Chr:1         | 312            | 17           | 142        | 125           |
| ZMNAC19    | NM_001157429              | Chr:2         | 312            | 5            | 144        | 139           |
| ZMNAC20    | GRMZM2G156977_T01         | Chr:2         | 317            | 11           | 148        | 137           |
| ZMNAC21    | GRMZM2G178998_T01         | Chr:2         | 344            | 7            | 136        | 129           |
| ZMNAC22    | GRMZM2G178998_T02         | Chr:2         | 170            | 7            | 136        | 129           |
| ZMNAC23    | NM_001137855              | Chr:2         | 320            | 10           | 151        | 141           |
| ZMNAC24    | AC212859.3_FGT008         | Chr:2         | 328            | 10           | 151        | 141           |
| ZMNAC25    | GRMZM2G176677_T01         | Chr:2         | 408            | 6            | 134        | 128           |
| ZMNAC26    | GRMZM2G176677_T04         | Chr:2         | 168            | 6            | 134        | 128           |
| ZMNAC27    | NM_001156824              | Chr:2         | 295            | 10           | 137        | 127           |
| ZMNAC28    | GRMZM2G081930_T01         | Chr:2         | 297            | 10           | 137        | 127           |
| ZMNAC29    | NM_001153290              | Chr:2         | 438            | 57           | 205        | 148           |
| ZMNAC30    | GRMZM2G450445_T01         | Chr:2         | 289            | 57           | 205        | 148           |
| ZMNAC31    | NM_001157307              | Chr:2         | 364            | 11           | 136        | 125           |
| ZMNAC32    | GRMZM2G009892_T01         | Chr:2         | 365            | 11           | 136        | 125           |
| ZMNAC33    | GRMZM2G099144_T01         | Chr:2         | 362            | 46           | 175        | 129           |
| ZMNAC34    | GRMZM2G316840_T01         | Chr:2         | 211            | 10           | 131        | 121           |
| ZMNAC35    | GRMZM2G018436_T01         | Chr:2         | 322            | 20           | 155        | 135           |
| ZMNAC36    | GRMZM2G162739_T01         | Chr:2         | 303            | 22           | 147        | 125           |
| ZMNAC37    | GRMZM2G162739_T02         | Chr:2         | 186            | 22           | 147        | 125           |

|         |                   |       |      |     |     |     |
|---------|-------------------|-------|------|-----|-----|-----|
| ZMNAC38 | GRMZM2G008374_T01 | Chr:2 | 388  | 21  | 156 | 135 |
| ZMNAC39 | GRMZM2G179049_T01 | Chr:2 | 285  | 11  | 146 | 135 |
| ZMNAC40 | GRMZM2G309582_T01 | Chr:2 | 242  | 29  | 160 | 131 |
| ZMNAC41 | GRMZM2G166721_T01 | Chr:3 | 436  | 43  | 185 | 142 |
| ZMNAC42 | NM_001158829      | Chr:3 | 440  | 43  | 185 | 142 |
| ZMNAC43 | NM_001111762      | Chr:3 | 391  | 24  | 155 | 131 |
| ZMNAC44 | GRMZM2G062650_T01 | Chr:3 | 391  | 24  | 155 | 131 |
| ZMNAC45 | GRMZM2G064541_T01 | Chr:3 | 517  | 9   | 136 | 127 |
| ZMNAC46 | GRMZM2G114850_T01 | Chr:3 | 338  | 13  | 143 | 130 |
| ZMNAC47 | GRMZM2G139700_T01 | Chr:3 | 368  | 13  | 141 | 128 |
| ZMNAC48 | NM_001157765      | Chr:3 | 232  | 13  | 147 | 134 |
| ZMNAC49 | NM_001149662      | Chr:3 | 443  | 35  | 160 | 125 |
| ZMNAC50 | GRMZM2G140174_T01 | Chr:3 | 448  | 35  | 160 | 125 |
| ZMNAC51 | GRMZM2G014653_T03 | Chr:3 | 202  | 10  | 134 | 124 |
| ZMNAC52 | GRMZM2G014653_T02 | Chr:3 | 295  | 10  | 134 | 124 |
| ZMNAC53 | GRMZM2G334796_T01 | Chr:3 | 292  | 5   | 141 | 136 |
| ZMNAC54 | GRMZM2G312201_T01 | Chr:3 | 1467 | 21  | 148 | 127 |
| ZMNAC55 | NM_001150285      | Chr:3 | 326  | 16  | 147 | 131 |
| ZMNAC56 | GRMZM2G122615_T01 | Chr:3 | 329  | 16  | 147 | 131 |
| ZMNAC57 | GRMZM2G058518_T01 | Chr:3 | 323  | 70  | 211 | 141 |
| ZMNAC58 | GRMZM2G069047_T01 | Chr:4 | 379  | 11  | 139 | 128 |
| ZMNAC59 | NM_001165742      | Chr:4 | 358  | 31  | 156 | 125 |
| ZMNAC60 | GRMZM2G123246_T01 | Chr:4 | 368  | 41  | 166 | 125 |
| ZMNAC61 | GRMZM2G100583_T01 | Chr:4 | 228  | 22  | 162 | 140 |
| ZMNAC62 | GRMZM2G125777_T01 | Chr:4 | 665  | 26  | 154 | 128 |
| ZMNAC63 | GRMZM2G048826_T01 | Chr:4 | 295  | 16  | 151 | 135 |
| ZMNAC64 | AC198937.4_FGT005 | Chr:4 | 381  | 17  | 144 | 127 |
| ZMNAC65 | NM_001154298      | Chr:4 | 344  | 13  | 138 | 125 |
| ZMNAC66 | GRMZM2G104078_T02 | Chr:4 | 399  | 57  | 201 | 144 |
| ZMNAC67 | GRMZM2G062009_T01 | Chr:4 | 294  | 10  | 139 | 129 |
| ZMNAC68 | GRMZM2G354151_T01 | Chr:4 | 380  | 7   | 136 | 129 |
| ZMNAC69 | NM_001159059      | Chr:4 | 657  | 24  | 160 | 136 |
| ZMNAC70 | GRMZM2G140901_T01 | Chr:4 | 298  | 10  | 139 | 129 |
| ZMNAC71 | GRMZM2G439903_T01 | Chr:4 | 309  | 16  | 149 | 133 |
| ZMNAC72 | GRMZM2G123667_T01 | Chr:4 | 359  | 9   | 133 | 124 |
| ZMNAC73 | GRMZM2G123667_T05 | Chr:4 | 174  | 9   | 133 | 124 |
| ZMNAC74 | NM_001147627      | Chr:4 | 350  | 14  | 146 | 132 |
| ZMNAC75 | GRMZM2G336533_T01 | Chr:5 | 436  | 153 | 283 | 130 |
| ZMNAC76 | GRMZM2G336533_T02 | Chr:5 | 312  | 153 | 283 | 130 |
| ZMNAC77 | GRMZM2G018553_T02 | Chr:5 | 178  | 19  | 149 | 130 |
| ZMNAC78 | GRMZM2G018553_T01 | Chr:5 | 302  | 19  | 149 | 130 |
| ZMNAC79 | GRMZM2G112548_T01 | Chr:5 | 336  | 28  | 155 | 127 |

|          |                           |       |     |    |     |     |
|----------|---------------------------|-------|-----|----|-----|-----|
| ZMNAC80  | GRMZM2G063522_T01         | Chr:5 | 305 | 14 | 146 | 132 |
| ZMNAC81  | GRMZM2G389557_T01         | Chr:5 | 268 | 11 | 146 | 135 |
| ZMNAC82  | GRMZM2G094067_T01         | Chr:5 | 225 | 8  | 136 | 128 |
| ZMNAC83  | GRMZM2G038073_T01         | Chr:5 | 399 | 57 | 201 | 144 |
| ZMNAC84  | GRMZM2G315140_T01         | Chr:5 | 342 | 7  | 136 | 129 |
| ZMNAC85  | GRMZM2G100593_T01         | Chr:5 | 386 | 16 | 143 | 127 |
| ZMNAC86  | NM_001154860              | Chr:6 | 275 | 19 | 158 | 139 |
| ZMNAC87  | GRMZM2G052239_T01         | Chr:6 | 277 | 19 | 158 | 139 |
| ZMNAC88  | GRMZM2G030325_T01         | Chr:6 | 380 | 50 | 175 | 125 |
| ZMNAC89  | GRMZM2G092465_T02         | Chr:6 | 185 | 11 | 139 | 128 |
| ZMNAC90  | GRMZM2G092465_T01         | Chr:6 | 418 | 11 | 139 | 128 |
| ZMNAC91  | GRMZM2G393433_T01         | Chr:6 | 357 | 15 | 143 | 128 |
| ZMNAC92  | GRMZM2G091490_T01         | Chr:6 | 367 | 11 | 144 | 133 |
| ZMNAC93  | GRMZM2G074358_T01         | Chr:6 | 326 | 7  | 142 | 135 |
| ZMNAC94  | GRMZM2G041746_T01         | Chr:6 | 366 | 10 | 140 | 130 |
| ZMNAC95  | GRMZM2G027309_T01         | Chr:6 | 413 | 58 | 196 | 138 |
| ZMNAC96  | GRMZM2G086768_T01         | Chr:6 | 303 | 58 | 196 | 138 |
| ZMNAC97  | GRMZM2G379608_T01         | Chr:6 | 264 | 11 | 149 | 138 |
| ZMNAC98  | GRMZM2G147867_T01         | Chr:6 | 420 | 42 | 167 | 125 |
| ZMNAC99  | GRMZM2G180328_T01         | Chr:6 | 339 | 22 | 146 | 124 |
| ZMNAC100 | GRMZM2G456568_T01         | Chr:6 | 452 | 6  | 133 | 127 |
| ZMNAC101 | GRMZM2G031200_T01         | Chr:6 | 319 | 62 | 202 | 140 |
| ZMNAC102 | GRMZM2G033014_T01         | Chr:7 | 315 | 16 | 147 | 131 |
| ZMNAC103 | GRMZM2G479980_T01         | Chr:7 | 358 | 38 | 169 | 131 |
| ZMNAC104 | PUT-7-171a-Zea_mays-10695 | Chr:7 | 336 | 21 | 146 | 125 |
| ZMNAC105 | GRMZM2G079632_T01         | Chr:7 | 300 | 24 | 149 | 125 |
| ZMNAC106 | GRMZM2G079632_T02         | Chr:7 | 192 | 24 | 149 | 125 |
| ZMNAC107 | GRMZM2G159094_T01         | Chr:7 | 419 | 15 | 142 | 127 |
| ZMNAC108 | NM_001136986              | Chr:7 | 709 | 10 | 135 | 125 |
| ZMNAC109 | NM_001157548              | Chr:7 | 251 | 11 | 140 | 129 |
| ZMNAC110 | GRMZM2G054277_T01         | Chr:7 | 157 | 11 | 138 | 127 |
| ZMNAC111 | AC233865.1_FGT002         | Chr:7 | 380 | 6  | 133 | 127 |
| ZMNAC112 | AC233865.1_FGT003         | Chr:7 | 245 | 6  | 134 | 128 |
| ZMNAC113 | GRMZM2G179885_T02         | Chr:7 | 410 | 27 | 155 | 128 |
| ZMNAC114 | NM_001158141              | Chr:7 | 386 | 12 | 139 | 127 |
| ZMNAC115 | GRMZM2G430849_T01         | Chr:7 | 463 | 89 | 216 | 127 |
| ZMNAC116 | PUT-7-171a-Zea_mays-12169 | Chr:7 | 133 | 9  | 132 | 123 |
| ZMNAC117 | GRMZM2G181605_T01         | Chr:7 | 318 | 9  | 141 | 132 |
| ZMNAC118 | NM_001153976              | Chr:8 | 518 | 9  | 136 | 127 |
| ZMNAC119 | GRMZM2G167492_T01         | Chr:8 | 518 | 9  | 136 | 127 |
| ZMNAC120 | GRMZM2G109627_T01         | Chr:8 | 398 | 27 | 162 | 135 |

|          |                   |        |     |     |     |     |
|----------|-------------------|--------|-----|-----|-----|-----|
| ZMNAC121 | GRMZM2G154182_T01 | Chr:8  | 359 | 23  | 153 | 130 |
| ZMNAC122 | GRMZM2G154182_T03 | Chr:8  | 192 | 23  | 153 | 130 |
| ZMNAC123 | GRMZM2G342647_T01 | Chr:8  | 566 | 379 | 508 | 129 |
| ZMNAC124 | GRMZM2G112681_T01 | Chr:8  | 494 | 95  | 237 | 142 |
| ZMNAC125 | GRMZM2G172264_T01 | Chr:8  | 283 | 6   | 142 | 136 |
| ZMNAC126 | GRMZM2G104400_T01 | Chr:8  | 445 | 6   | 133 | 127 |
| ZMNAC127 | GRMZM2G134687_T01 | Chr:8  | 425 | 52  | 177 | 125 |
| ZMNAC128 | NM_001154212      | Chr:8  | 356 | 14  | 147 | 133 |
| ZMNAC129 | GRMZM2G163843_T01 | Chr:8  | 356 | 14  | 147 | 133 |
| ZMNAC130 | GRMZM2G163841_T01 | Chr:8  | 312 | 23  | 155 | 132 |
| ZMNAC131 | GRMZM2G134073_T01 | Chr:8  | 259 | 22  | 160 | 138 |
| ZMNAC132 | GRMZM2G068973_T01 | Chr:8  | 308 | 20  | 147 | 127 |
| ZMNAC133 | NM_001153847      | Chr:9  | 433 | 11  | 142 | 131 |
| ZMNAC134 | GRMZM2G171395_T01 | Chr:9  | 435 | 11  | 142 | 131 |
| ZMNAC135 | GRMZM2G041668_T01 | Chr:9  | 349 | 20  | 154 | 134 |
| ZMNAC136 | GRMZM2G163914_T02 | Chr:9  | 612 | 11  | 141 | 130 |
| ZMNAC137 | GRMZM2G115721_T01 | Chr:9  | 310 | 50  | 210 | 160 |
| ZMNAC138 | GRMZM2G104074_T01 | Chr:9  | 357 | 10  | 139 | 129 |
| ZMNAC139 | GRMZM2G042494_T01 | Chr:9  | 241 | 10  | 138 | 128 |
| ZMNAC140 | GRMZM2G159500_T02 | Chr:9  | 348 | 22  | 149 | 127 |
| ZMNAC141 | GRMZM2G159500_T01 | Chr:9  | 234 | 22  | 149 | 127 |
| ZMNAC142 | AC233893.1_FGT005 | Chr:9  | 538 | 167 | 296 | 129 |
| ZMNAC143 | GRMZM2G126817_T01 | Chr:9  | 317 | 16  | 143 | 127 |
| ZMNAC144 | GRMZM2G174070_T01 | Chr:9  | 687 | 6   | 133 | 127 |
| ZMNAC145 | GRMZM2G127379_T01 | Chr:10 | 475 | 23  | 157 | 134 |
| ZMNAC146 | GRMZM2G083347_T01 | Chr:10 | 259 | 12  | 148 | 136 |
| ZMNAC147 | GRMZM2G167018_T01 | Chr:10 | 282 | 12  | 140 | 128 |
| ZMNAC148 | NM_001154759      | Chr:10 | 284 | 12  | 142 | 130 |
| ZMNAC149 | GRMZM2G003715_T01 | Chr:10 | 664 | 6   | 139 | 133 |
| ZMNAC150 | NM_001158179      | Chr:10 | 335 | 10  | 139 | 129 |
| ZMNAC151 | GRMZM2G435824_T01 | Chr:10 | 349 | 10  | 139 | 129 |
| ZMNAC152 | GRMZM2G043813_T01 | Chr:10 | 293 | 10  | 138 | 128 |

**Table S2.** Detailed information on, and structures of representative ZmNAC proteins.

**Table S3.**

| <b>Motif Number</b> | <b>Domain</b> | <b>Size</b> | <b>Motif Sequence</b>                                                                                                                                                                                                 |
|---------------------|---------------|-------------|-----------------------------------------------------------------------------------------------------------------------------------------------------------------------------------------------------------------------|
| 28                  | zinc-ribbon   | 159         | DDESCDDESSDATLDDDDSSNASLAAASGPKRESDEVES<br>DATVAAPSRHSAPNDEISGGS AVAPGRKEKREIGEVSTETS<br>AAVRKRRKADGSSSPGTPVSTTDMHCPQCGTHLMLTLNM<br>AESKSETGLAKDESATTAPDQGGTGESSQKNVRVRFHQF                                           |
| 1                   | NAM           | 35          | WYFFCPRDRKYPNGSRTNRATGSGYWKATGKDKPI                                                                                                                                                                                   |
| 2                   | NAM           | 19          | GFRFHPTDEELVCHYLCRK                                                                                                                                                                                                   |
| 3                   | NAM           | 18          | GRAPKGVKTNWIMHEYRL                                                                                                                                                                                                    |
| 4                   | NAM           | 21          | IIAEVDLYKCEPWDLPEKCKI                                                                                                                                                                                                 |
| 5                   | NAM           | 15          | NGRLVGMKKTLV FYR                                                                                                                                                                                                      |
| 7                   | NAM           | 57          | PHPLIDEFIPTIDEEEGICYTHPEKLPGVKQDGSVKHFFHRP<br>FKAYTTGTRKRRKII                                                                                                                                                         |
| 8                   | NAM           | 41          | CIDNIDVKQQWPGLPAGVKFDPTDQELIWHLEAKVGNENS<br>K                                                                                                                                                                         |
| 9                   | NAM           | 21          | CSRHTGSGYWHKTGKEKPVYM                                                                                                                                                                                                 |
| 12                  | NAM           | 15          | GKRERTNWVMHEYHL                                                                                                                                                                                                       |
| 21                  | GHPB          | 124         | HGHPASARSTPSRGVV TAPQQDNKQQASSSTPTPPTPSK<br>MMQFLHGECTSSQPA AICRN SHHAAAAAHSNNKAAAAG<br>AQRQSQFLPTKPYCSGYQQLSTASSAGSAVGA AVDHHHH<br>QQQQQQ                                                                            |
| 18                  | DUF373<br>9   | 159         | QVAMAGPEMDQNQNNIPAIPIPMPLQLPLPVPMMQMFILP<br>DFAMDPVAPYYPNP NAGAGMMPPMALAGMGGAGGLQIN<br>GALFGNPVPAPLPMNFYHHQMGMGAAAGQVDMGAAAG<br>QMDMGAAGAGAGGFDVAAPESRPSSMVSQKDEQANA AE<br>ISSMM                                      |
| 13                  | DUF129<br>6   | 80          | EYVVS KLFFQQQFKPGDKNAQELTTSDDLESMAAESNLPD<br>FTTLPTDKHVGTVQEVVHNPEHNL YQLNRNCEISIEETVV                                                                                                                                |
| 6                   | -             | 21          | SQQKDDWVLCRIFKKNIWQK                                                                                                                                                                                                  |
| 10                  | -             | 113         | PLPNPSGCTPFHHGHPHSMQPPPLPPSNHAGKAVFTGA<br>AAACCMQQEPADGSNSAVLPMPPFPFTPIVAGKPAAPAP<br>PPQVVNAGPQEPPPPTWLEAYLQHTGGILYEMG                                                                                                |
| 11                  | -             | 118         | DSSPPNGGKELEVWLEELLDPSPSFNLVADTRSADVSLTD<br>QYAESSNLQNP GS VSRNIGPGHASPIQDGT DATDYLLTDD<br>LPEDLYSMLYPGTDQFYDSMFLEQAGQEGIAFPTNQAY                                                                                     |
| 14                  | -             | 15          | QQQERDAEAELNLPP                                                                                                                                                                                                       |
| 15                  | -             | 56          | TAVPATHFLISRPSNCVSTIVPPAMQHANVVLDHDQFHVP<br>AIMMHHHDKFQNDHQQ                                                                                                                                                          |
| 16                  | -             | 79          | NAELQSDQENNTNLANGNTDTGITIQSRRATTSPANISLA<br>AGKIKMQVGINRMVTSSSVSINQTMRFDTNSGRRLDLK                                                                                                                                    |
| 17                  | -             | 200         | MVPPLADYEHLDRDGPSPGGFFDDYFCGSTSLYAAA PAI<br>GGGAAAAGTTNTTTTPAVVMQQHQQPAALPRLPKIPSISE<br>LLWDEYALAQILDPPADVAADHASFAVHPSLNQLLAVGD<br>DGS DLM MFSPPPAAAAGGKRKAMVAMNMSPADECAATA<br>HQQSPAAKRLNGGSCFDDAPQPASGLPATMSSVLGGGL |



|    |   |     |                                                                                                                                                                          |
|----|---|-----|--------------------------------------------------------------------------------------------------------------------------------------------------------------------------|
|    |   |     | NHHM                                                                                                                                                                     |
| 19 | - | 159 | NKSMEISETETACEEPEAPASVIGPKTPKTITPQPRHPKNSP<br>CETQQNIFIVQDQLLLDGEGETMPIVSLEDDAMNPAWCA<br>VAEEEQVVGESRAQSNSDEPLLCREDPNLNDEALLPWD<br>YPILSQCRNEIFDGNLNGYGLPDHNVLDLGTTPDLQL |
| 20 | - | 48  | LAYMHPHPYHHAASYYSQM QAPGPHATAYSHHVQVQD<br>LLTNHRPTDD                                                                                                                     |
| 22 | - | 59  | GGARTSDLFVDLSYDDIQGMYSGLDMLPPAGEDLYSSLF<br>ASPRVRGNQPTGPAGLGP                                                                                                            |
| 23 | - | 41  | MGTSWIINCQGIACKIRNATQSFNPRIQEWIANPRKECPNC                                                                                                                                |
| 24 | - | 20  | SISHSWGETRTPESIVDND                                                                                                                                                      |
| 25 | - | 41  | IDLTTCLRSKPLCMHHHHQDQAMGDALWDLLEEMAAA<br>GGE                                                                                                                             |
| 26 | - | 17  | GITDWRILDKFVASQLN                                                                                                                                                        |
| 27 | - | 55  | HLSTTTARSSGSKAAATMEKKHRTSASPRMAPVFDGGH<br>SSGYMNKPYSGANTTM                                                                                                               |
| 29 | - | 41  | FAPFRKTFDQEVGIGGDQVPSNQLGRSEPHHAGLGQPHG<br>P                                                                                                                             |
| 30 | - | 41  | SAGLEELIMGCTSSTSTKGDASIAHPQETEWYPYWPDPN<br>Q                                                                                                                             |
| 31 | - | 111 | FPTSYAGYYDHNLSSTARLHVDGDRHFLAGSSAAAAALL<br>QPPGLAGSSFPQLYSDDDLESKKQLLSIPPLESPTAMACC<br>SDAGGYAQRSSYDEHEMMMMMIQGGGGGGEQ                                                   |
| 32 | - | 41  | CQGDPNQTLPTQAPLLFPNLEKIWDWNPLESPKVCTSK                                                                                                                                   |

**Table S3.** Details of predicted sequence motifs of ZmNAC proteins.
